# Supplementary material for: Neuronal Encoding of Texture in the Whisker Sensory Pathway
Source: PubMed Central journal article supplement (PMC544542; doi:10.1371/journal.pbio.0030017), 2005-01-11

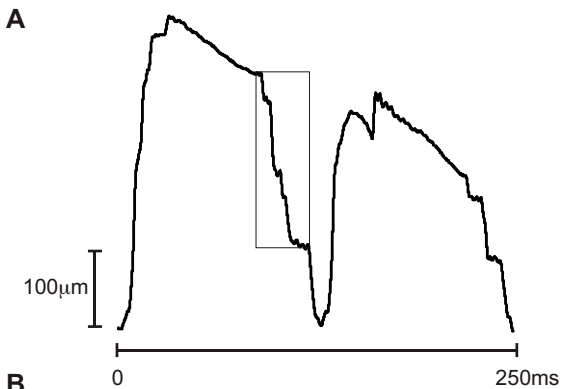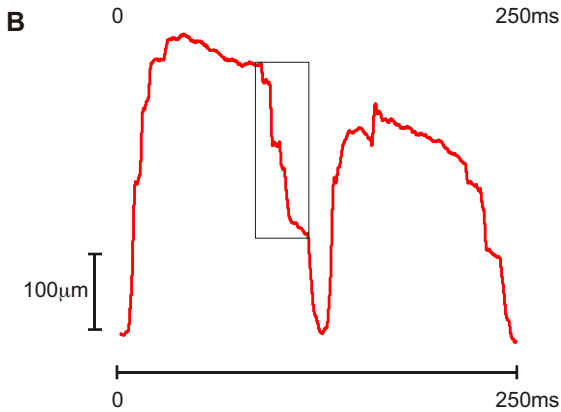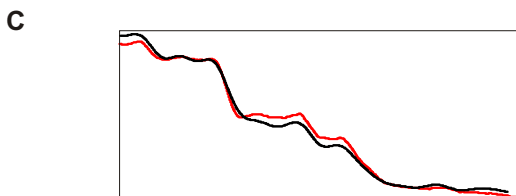

Supplement: pbio.0030017.sg001.pdf [file pbio.0030017.sg001.pdf]
